# Supplementary material
Source: MDPI journal article supplement (https://www.mdpi.com/2220-9964/6/3/59)
Supplement: s1 [file s1]

# Supplementary Materials: Landsat-Based Land Cover Change in the Beijing-Tianjin-Tangshan Urban Agglomeration in 1990, 2000 and 2010

Aqiang Yang and Guoqing Sun

**Table S1.** Error matrix for the year 1990 (unit: point).

|                    | Forest | Shrub | Grass | Bare Land | Dry Farmland | Impervious Surface | Water Bodies | Aquatic Vegetation | Paddy Field |
|--------------------|--------|-------|-------|-----------|--------------|--------------------|--------------|--------------------|-------------|
| Forest             | 67     | 1     | 5     | 0         | 2            | 0                  | 0            | 0                  | 0           |
| Shrub              | 4      | 45    | 3     | 1         | 1            | 1                  | 0            | 0                  | 0           |
| Grass              | 6      | 1     | 38    | 0         | 0            | 0                  | 0            | 0                  | 0           |
| Bare Land          | 0      | 0     | 0     | 43        | 1            | 3                  | 0            | 0                  | 0           |
| Dry Farmland       | 3      | 2     | 2     | 0         | 112          | 3                  | 1            | 0                  | 3           |
| Impervious Surface | 0      | 1     | 0     | 1         | 7            | 44                 | 0            | 0                  | 0           |
| Water Bodies       | 0      | 0     | 0     | 0         | 0            | 1                  | 41           | 0                  | 2           |
| Aquatic Vegetation | 2      | 1     | 2     | 0         | 0            | 0                  | 0            | 35                 | 0           |
| Paddy Field        | 0      | 0     | 1     | 0         | 2            | 1                  | 2            | 1                  | 34          |

**Table S2.** Error matrix for the year 2000 (unit: point).

|                    | Forest | Shrub | Grass | Bare Land | Dry Farmland | Impervious Surface | Water Bodies | Aquatic Vegetation | Paddy Field |
|--------------------|--------|-------|-------|-----------|--------------|--------------------|--------------|--------------------|-------------|
| Forest             | 67     | 1     | 5     | 0         | 2            | 0                  | 0            | 0                  | 0           |
| Shrub              | 4      | 46    | 3     | 0         | 1            | 0                  | 0            | 0                  | 0           |
| Grass              | 6      | 1     | 39    | 1         | 0            | 0                  | 0            | 0                  | 0           |
| Bare Land          | 0      | 0     | 0     | 44        | 1            | 1                  | 0            | 0                  | 0           |
| Dry Farmland       | 2      | 2     | 2     | 0         | 113          | 2                  | 1            | 0                  | 3           |
| Impervious Surface | 0      | 1     | 0     | 1         | 7            | 47                 | 0            | 0                  | 0           |
| Water Bodies       | 0      | 0     | 0     | 0         | 0            | 2                  | 40           | 0                  | 2           |
| Aquatic Vegetation | 2      | 1     | 2     | 0         | 0            | 0                  | 0            | 34                 | 0           |
| Paddy Field        | 0      | 0     | 0     | 0         | 2            | 0                  | 1            | 1                  | 36          |

**Table S3.** Error matrix for the year 2010 (unit: point).

|                    | Forest | Shrub | Grass | Bare Land | Dry Farmland | Impervious Surface | Water Bodies | Aquatic Vegetation | Paddy Field |
|--------------------|--------|-------|-------|-----------|--------------|--------------------|--------------|--------------------|-------------|
| Forest             | 67     | 1     | 5     | 0         | 3            | 0                  | 0            | 0                  | 0           |
| Shrub              | 4      | 45    | 2     | 1         | 1            | 1                  | 0            | 0                  | 0           |
| Grass              | 6      | 1     | 40    | 0         | 0            | 0                  | 0            | 0                  | 0           |
| Bare Land          | 0      | 0     | 1     | 42        | 0            | 4                  | 0            | 0                  | 0           |
| Dry Farmland       | 3      | 2     | 2     | 0         | 112          | 3                  | 0            | 0                  | 3           |
| Impervious Surface | 2      | 0     | 0     | 1         | 8            | 45                 | 0            | 0                  | 0           |
| Water Bodies       | 0      | 0     | 0     | 0         | 0            | 0                  | 38           | 0                  | 3           |
| Aquatic Vegetation | 0      | 1     | 2     | 0         | 0            | 0                  | 2            | 35                 | 0           |
| Paddy Field        | 0      | 0     | 0     | 0         | 2            | 0                  | 3            | 1                  | 34          |

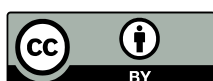

© 2017 by the authors; licensee MDPI, Basel, Switzerland. This article is an open access article distributed under the terms and conditions of the Creative Commons Attribution (CC BY) license (<http://creativecommons.org/licenses/by/4.0/>).
